# Supplementary material for: Hypertensive Disorders of Pregnancy and Offspring Cardiac Structure and Function in Adolescence
Source: PubMed Central journal article supplement (PMC5210338; doi:10.1161/jaha.116.003906), 2016-10-31
Supplement: JAH3-5-e003906-s001.pdf [file JAH3-5-e003906-s001.pdf]

## **SUPPLEMENTAL MATERIAL**

**Table S1.** Description of study sample

| <b>Obstetric and maternal variables</b>                    | <b>Study sample</b> | <b>Total follow-up, age 17 year clinic</b> | <b>ALSPAC offspring alive &gt; age 1 years</b> |
|------------------------------------------------------------|---------------------|--------------------------------------------|------------------------------------------------|
| Number of subjects (singletons with birth data)            | 1,592               | 4,770                                      | 13,617                                         |
| Female offspring, N (%)                                    | 857 (53.8)          | 2,676 (56.1)                               | 6,594 (48.4)                                   |
| Birth weight, kg Mean (SD)                                 | 3.43 (0.51)         | 3.43 (0.52, N=4,717)                       | 3.41 (0.54, N=13,446)                          |
| Maternal age at delivery, years Mean (SD)                  | 29.5 (4.6)          | 29.2 (4.7)                                 | 28.0 (5.0)                                     |
| Gestational length, weeks Median (IQR)                     | 40 (39-41)          | 40 (39-41)                                 | 40 (39-41)                                     |
| Maternal pre-pregnancy BMI, Kg/m <sup>2</sup> Median (IQR) | 22.2 (20.5–24.4)    | 22.1 (20.5–24.2, N=4,330)                  | 22.9 (20.5-24.7, N=11,255)                     |
| First pregnancy, N (%)                                     | 813 (51.1)          | 2,223 of 4,612 (48.2)                      | 5,660 of 12,600 (44.9)                         |
| Diabetes or glycosuria during pregnancy, N (%)             | 54 (3.4)            | 189 of 4,583 (4.1)                         | 494 of 12,047 (4.1)                            |
| HDP or hypertension, N (%)                                 |                     | N=4,546                                    | N=13,845                                       |
| - No HDP or hypertension                                   | 1,260 (79.2)        | 3,613 (79.5)                               | 11,234 (83.8)                                  |
| - Gestational hypertension                                 | 247 (15.5)          | 673 (14.8)                                 | 1,886 (14.4)                                   |
| - Preeclampsia                                             | 42 (2.6)            | 107 (2.4)                                  | 281 (2.1)                                      |
| - Essential hypertension                                   | 43 (2.7)            | 153 (3.4)                                  | 444 (3.2)                                      |
| Maternal smoking status during pregnancy, N (%)            |                     | N=4,674                                    | N=12,777                                       |
| - Never smoked                                             | 1,275 (80.1)        | 3,595 (76.9)                               | 9,520 (74.5)                                   |
| - Stopped prior the second trimester                       | 131 (8.2)           | 486 (10.4)                                 | 885 (6.9)                                      |
| - Smoked during the second trimester                       | 186 (11.7)          | 593 (12.7)                                 | 2,372 (18.6)                                   |
| Maternal educational level, N (%)                          |                     | N=4,604                                    | N=12,102                                       |
| - Compulsory/Vocational                                    | 291 (18.3)          | 896 (19.5)                                 | 2,439 (20.2)                                   |
| - Compulsory (higher achievement)                          | 541 (34.0)          | 1,571 (34.1)                               | 1,196 (30.0)                                   |
| - Secondary (academic preparation)                         | 427 (26.8)          | 1,277 (27.7)                               | 4,185 (34.6)                                   |
| - Tertiary/Degree                                          | 333 (20.9)          | 860 (18.7)                                 | 1,554 (12.8)                                   |
| <b>Measures from the 17 years follow-up clinic</b>         |                     |                                            |                                                |
| Offspring age, Mean years (SD)                             | 17.7 (0.3)          | 17.8 (0.4)                                 | n/a                                            |
| Offspring BMI, Kg/m <sup>2</sup> Median (IQR)              | 21.8 (20.0-24.6)    | 21.9 (20.1-24.6, N=4,632)                  | n/a                                            |
| Offspring SBP, mmHg Mean (SD)                              | 118.9 (11.0)        | 118.5 (10.9, N=4,297)                      | n/a                                            |
| Offspring DBP, mmHg Mean (SD)                              | 63.5 (6.5)          | 63.9 (6.6, N=4,297)                        | n/a                                            |
| Offspring MAP, mmHg Mean (SD)                              | 82.0 (6.8)          | 82.1 (6.8, N=4,297)                        | n/a                                            |

ALSPAC: the Avon Longitudinal Study of Parents and Children, BMI: Body mass index, DBP: Diastolic blood pressure, HDP: Hypertension disorders of pregnancy, IQR: Interquartile range, MAP: Mean arterial pressure, SBP: Systolic blood pressure, SD: Standard deviation

**Table S2.** The association between preeclampsia or hypertension during pregnancy and adolescent offspring cardiac structure and function shown as mean differences compared to offspring of normotensive women.

| Outcome                   | Model | Preeclampsia |         |       | Gestational hypertension |         |       | Essential hypertension |         |       |
|---------------------------|-------|--------------|---------|-------|--------------------------|---------|-------|------------------------|---------|-------|
|                           |       | Mean         | 95 % CI |       | Mean                     | 95 % CI |       | Mean                   | 95 % CI |       |
| Cardiac structure         |       |              |         |       |                          |         |       |                        |         |       |
| RWT                       | I*    | <b>0.021</b> | 0.004   | 0.038 | 0.007                    | -0.0005 | 0.015 | <b>0.017</b>           | 0.001   | 0.034 |
|                           | II†   | <b>0.025</b> | 0.008   | 0.043 | <b>0.010</b>             | 0.002   | 0.017 | <b>0.021</b>           | 0.004   | 0.038 |
|                           | III‡  | <b>0.021</b> | 0.004   | 0.039 | 0.007                    | -0.0003 | 0.015 | <b>0.019</b>           | 0.002   | 0.036 |
| LVMI, g/m <sup>2.7</sup>  | I     | 0.001        | -1.9    | 1.9   | <b>1.2</b>               | 0.33    | 2.0   | <b>2.2</b>             | 0.31    | 4.0   |
|                           | II    | -0.63        | -2.5    | 1.3   | 0.66                     | -0.19   | 1.5   | 1.6                    | -0.27   | 3.4   |
|                           | III   | -0.52        | -2.2    | 1.1   | 0.15                     | -0.57   | 0.88  | <b>1.8</b>             | 0.19    | 3.4   |
| LVEDv, ml                 | I     | <b>-6.7</b>  | -13     | -0.8  | 1.7                      | -0.9    | 4.3   | 0.9                    | -4.9    | 6.6   |
|                           | II    | <b>-9.0</b>  | -15     | -3.1  | 0.1                      | -2.6    | 2.7   | -1.3                   | -7.0    | 4.5   |
|                           | III   | <b>-6.7</b>  | -12     | -1.1  | -0.6                     | -3.1    | 1.9   | -0.4                   | -5.9    | 5.1   |
| Systolic function         |       |              |         |       |                          |         |       |                        |         |       |
| EF, %                     | I     | 1.6          | -0.34   | 3.5   | 0.81                     | -0.04   | 1.7   | 1.2                    | -0.66   | 3.1   |
|                           | II    | 1.2          | -0.77   | 3.1   | 0.66                     | -0.21   | 1.5   | 1.1                    | -0.77   | 3.1   |
|                           | III   | 1.0          | -1.0    | 3.0   | 0.64                     | -0.24   | 1.5   | 1.1                    | -0.84   | 3.0   |
| MFS, %                    | I     | -0.10        | -0.75   | 0.56  | 0.05                     | -0.24   | 0.34  | -0.01                  | -0.65   | 0.63  |
|                           | II    | -0.30        | -0.96   | 0.36  | -0.04                    | -0.34   | 0.25  | -0.11                  | -0.76   | 0.54  |
|                           | III   | -0.26        | -0.93   | 0.42  | 0.0003                   | -0.30   | 0.30  | -0.09                  | -0.74   | 0.56  |
| s'                        | I     | 0.43         | -0.03   | 0.89  | 0.05                     | -0.16   | 0.25  | -0.27                  | -0.71   | 0.18  |
|                           | II    | 0.35         | -0.12   | 0.82  | -0.01                    | -0.22   | 0.20  | -0.33                  | -0.78   | 0.11  |
|                           | III   | 0.30         | -0.18   | 0.77  | -0.01                    | -0.22   | 0.20  | -0.36                  | -0.81   | 0.09  |
| Diastolic function        |       |              |         |       |                          |         |       |                        |         |       |
| E/A                       | I     | -0.01        | -0.13   | 0.12  | -0.05                    | -0.11   | 0.003 | 0.07                   | -0.06   | 0.19  |
|                           | II    | 0.01         | -0.12   | 0.14  | -0.05                    | -0.10   | 0.010 | 0.07                   | -0.05   | 0.20  |
|                           | III   | 0.02         | -0.11   | 0.15  | -0.04                    | -0.09   | 0.020 | 0.08                   | -0.04   | 0.20  |
| E/e'                      | I     | -0.042       | -0.36   | 0.28  | -0.052                   | -0.19   | 0.09  | 0.10                   | -0.20   | 0.41  |
|                           | II    | 0.004        | -0.32   | 0.33  | -0.035                   | -0.18   | 0.11  | 0.13                   | -0.18   | 0.44  |
|                           | III   | -0.003       | -0.33   | 0.33  | -0.021                   | -0.16   | 0.12  | 0.13                   | -0.18   | 0.43  |
| LADI, cm/m <sup>2.7</sup> | I     | 0.024        | -0.014  | 0.062 | 0.005                    | -0.011  | 0.022 | 0.006                  | -0.032  | 0.043 |
|                           | II    | 0.013        | -0.025  | 0.052 | -0.001                   | -0.018  | 0.016 | -0.003                 | -0.040  | 0.035 |
|                           | III   | 0.011        | -0.025  | 0.046 | -0.008                   | -0.023  | 0.008 | 0.004                  | -0.031  | 0.038 |

95 % CI: 95 % confidence interval, A: Velocity of the late filling wave of the left ventricle in diastole, e': Tissue velocity of the lateral mitral annulus during early diastolic filling of the left ventricle, E: Velocity of early filling wave of the left ventricle in diastole, EF: Ejection Fraction, EH: Essential hypertension, MFS: Midwall fractional shortening, LADI: Left atrial diameter indexed to height in m<sup>2.7</sup>, LVEDv: Left ventricular end diastolic volume, LVMI: Left ventricular mass indexed to height in m<sup>2.7</sup>, RWT: Relative wall thickness, s': Average tissue velocity of the septal and lateral left ventricular wall in systole

\* Model I adjusted for offspring sex, offspring age at follow-up

† Model II additionally adjusted for maternal age, diabetes/glycosuria during pregnancy, parity, smoking during pregnancy, maternal body mass index, maternal education

‡ Model III additionally adjusted for offspring birth weight, gestational length, offspring body mass index, offspring mean arterial pressure

**Table S3.** The association between rate of maternal systolic blood pressure change during pregnancy and offspring cardiac outcomes in adolescence

| Outcome                      | Model | Rate of blood pressure change during gestation (mmHg/week) |         |       |              |         |       |            |         |           |               |        |         |
|------------------------------|-------|------------------------------------------------------------|---------|-------|--------------|---------|-------|------------|---------|-----------|---------------|--------|---------|
|                              |       | Week 8-18                                                  |         |       | Week 18-30   |         |       | Week 30-36 |         | ≥ Week 36 |               |        |         |
|                              |       | Mean                                                       | 95 % CI |       | Mean         | 95 % CI |       | Mean       | 95 % CI | Mean      | 95 % CI       |        |         |
| <b>Cardiac structure</b>     |       |                                                            |         |       |              |         |       |            |         |           |               |        |         |
| RWT                          | I*    | -0.005                                                     | -0.020  | 0.007 | 0.003        | -0.019  | 0.028 | 0.005      | -0.002  | 0.012     | -0.001        | -0.009 | 0.006   |
|                              | II†   | -0.001                                                     | -0.016  | 0.012 | 0.004        | -0.023  | 0.042 | 0.006      | -0.004  | 0.016     | -0.001        | -0.015 | 0.011   |
|                              | III‡  | -0.003                                                     | -0.017  | 0.010 | 0.003        | -0.026  | 0.044 | 0.004      | -0.008  | 0.015     | -0.001        | -0.017 | 0.013   |
| LVMI,<br>g/m <sup>2.7</sup>  | I     | <b>1.4</b>                                                 | 0.14    | 3.5   | -1.7         | -5.2    | 0.6   | 0.19       | -0.5    | 1.0       | -0.53         | -1.5   | 0.2     |
|                              | II    | <b>1.5</b>                                                 | 0.17    | 3.5   | -1.3         | -7.3    | 1.3   | 0.37       | -0.6    | 2.2       | -0.73         | -3.8   | 0.8     |
|                              | III   | <b>1.1</b>                                                 | 0.03    | 2.9   | -1.5         | -7.7    | 0.9   | -0.05      | -1.1    | 1.8       | -0.82         | -4.1   | 0.9     |
| LVEDv,<br>ml                 | I     | <b>4.9</b>                                                 | 0.89    | 11    | -4.5         | -15     | 2.6   | -0.52      | -2.9    | 1.8       | -0.6          | -3.2   | 1.8     |
|                              | II    | <b>4.2</b>                                                 | 0.27    | 10    | -3.1         | -20     | 5.0   | -0.25      | -3.2    | 4.5       | -1.1          | -7.7   | 3.0     |
|                              | III   | 3.6                                                        | -0.10   | 9.3   | -3.5         | -22     | 4.5   | 0.25       | -3.2    | 5.9       | -1.7          | -11    | 3.2     |
| <b>Systolic function</b>     |       |                                                            |         |       |              |         |       |            |         |           |               |        |         |
| EF, %                        | I     | 0.02                                                       | -1.5    | 1.6   | 0.29         | -2.3    | 3.1   | 0.19       | -0.56   | 1.0       | -0.20         | -1.1   | 0.55    |
|                              | II    | -0.01                                                      | -1.6    | 1.5   | 0.70         | -2.4    | 4.9   | 0.18       | -0.96   | 1.3       | -0.36         | -2.1   | 0.87    |
|                              | III   | -0.07                                                      | -1.6    | 1.5   | 0.53         | -2.9    | 4.9   | -0.03      | -1.4    | 1.2       | -0.48         | -2.6   | 0.97    |
| MFS, %                       | I     | 0.15                                                       | -0.34   | 0.70  | 0.04         | -0.9    | 1.0   | -0.06      | -0.33   | 0.19      | -0.04         | -0.33  | 0.22    |
|                              | II    | 0.02                                                       | -0.48   | 0.57  | 0.14         | -1.0    | 1.4   | -0.08      | -0.47   | 0.28      | -0.10         | -0.62  | 0.32    |
|                              | III   | 0.05                                                       | -0.44   | 0.60  | 0.13         | -1.2    | 1.4   | -0.09      | -0.56   | 0.34      | -0.13         | -0.81  | 0.36    |
| s'                           | I     | -0.26                                                      | -0.73   | 0.08  | 0.47         | -0.11   | 1.5   | 0.0002     | -0.18   | 0.19      | -0.004        | -0.18  | 0.17    |
|                              | II    | -0.28                                                      | -0.75   | 0.05  | 0.54         | -0.20   | 2.9   | -0.038     | -0.78   | 0.27      | 0.015         | -0.58  | 0.69    |
|                              | III   | -0.30                                                      | -0.77   | 0.03  | 0.58         | -0.24   | 3.6   | -0.053     | -1.0    | 0.38      | 0.030         | -0.69  | 1.0     |
| <b>Diastolic function</b>    |       |                                                            |         |       |              |         |       |            |         |           |               |        |         |
| E/A                          | I     | <b>0.11</b>                                                | 0.02    | 0.26  | <b>-0.16</b> | -0.43   | -0.01 | -0.003     | -0.05   | 0.05      | -0.02         | -0.07  | 0.02    |
|                              | II    | <b>0.11</b>                                                | 0.02    | 0.26  | -0.19        | -0.94   | 0.01  | -0.002     | -0.10   | 0.23      | -0.03         | -0.23  | 0.16    |
|                              | III   | <b>0.13</b>                                                | 0.04    | 0.28  | -0.18        | -1.1    | 0.03  | -0.007     | -0.14   | 0.25      | -0.03         | -0.27  | 0.19    |
| E/e'                         | I     | 0.11                                                       | -0.12   | 0.40  | -0.22        | -0.75   | 0.17  | -0.072     | -0.20   | 0.05      | <b>0.11</b>   | 0.01   | 0.25    |
|                              | II    | 0.13                                                       | -0.10   | 0.41  | -0.25        | -1.2    | 0.22  | -0.076     | -0.27   | 0.19      | 0.10          | -0.11  | 0.39    |
|                              | III   | 0.13                                                       | -0.10   | 0.41  | -0.22        | -1.3    | 0.30  | -0.12      | -0.36   | 0.18      | 0.11          | -0.13  | 0.46    |
| LADI,<br>cm/m <sup>2.7</sup> | I     | 0.023                                                      | -0.003  | 0.059 | -0.02        | -0.08   | 0.02  | 0.0003     | -0.015  | 0.015     | <b>-0.012</b> | -0.029 | -0.0004 |
|                              | II    | 0.022                                                      | -0.003  | 0.059 | -0.02        | -0.10   | 0.03  | 0.0029     | -0.015  | 0.031     | -0.014        | -0.045 | 0.0032  |
|                              | III   | 0.022                                                      | -0.0003 | 0.058 | -0.01        | -0.10   | 0.04  | -0.010     | -0.035  | 0.015     | -0.010        | -0.038 | 0.013   |

95 % CI: 95 % confidence interval, A: Velocity of the late filling wave of the left ventricle in diastole, e': Tissue velocity of the lateral mitral annulus during early diastolic filling of the left ventricle, E: Velocity of early filling wave of the left ventricle in diastole, EF: Ejection Fraction, EH: Essential hypertension, MFS: Midwall fractional shortening, LADI: Left atrial diameter indexed to height in m<sup>2.7</sup>, LVEDv: Left ventricular end diastolic volume, LVMI: Left ventricular mass indexed to height in m<sup>2.7</sup>, RWT: Relative wall thickness, s': Average tissue velocity of the septal and lateral left ventricular wall in systole

\* Model I adjusted for offspring sex, offspring age at follow-up

† Model II additionally adjusted for maternal age, diabetes/glycosuria during pregnancy, parity, smoking during pregnancy, maternal body mass index, maternal education, maternal systolic blood pressure gestational week 8, and, when applicable, previous rate of blood pressure change during the pregnancy

‡ Model III additionally adjusted for maternal preeclampsia/hypertension during pregnancy, offspring birth weight, gestational length, offspring body mass index, offspring mean arterial pressure

**Table S4.** The association between rate of maternal diastolic blood pressure change during pregnancy and offspring cardiac outcomes in adolescence

| Outcome                      | Model | Rate of blood pressure change during gestation (mmHg/week) |         |       |            |         |       |            |         |       |           |         |       |
|------------------------------|-------|------------------------------------------------------------|---------|-------|------------|---------|-------|------------|---------|-------|-----------|---------|-------|
|                              |       | Week 8-18                                                  |         |       | Week 18-30 |         |       | Week 30-36 |         |       | ≥ Week 36 |         |       |
|                              |       | Mean                                                       | 95 % CI |       | Mean       | 95 % CI |       | Mean       | 95 % CI |       | Mean      | 95 % CI |       |
| Cardiac structure            |       |                                                            |         |       |            |         |       |            |         |       |           |         |       |
| RWT                          | I*    | 0.010                                                      | -0.013  | 0.043 | -0.011     | -0.042  | 0.014 | 0.004      | -0.001  | 0.010 | 0.002     | -0.002  | 0.006 |
|                              | II†   | 0.016                                                      | -0.010  | 0.054 | -0.008     | -0.057  | 0.020 | 0.004      | -0.003  | 0.011 | 0.005     | -0.008  | 0.026 |
|                              | III‡  | 0.012                                                      | -0.015  | 0.050 | -0.014     | -0.074  | 0.017 | 0.001      | -0.008  | 0.009 | 0.004     | -0.019  | 0.031 |
| LVMI,<br>g/m <sup>2.7</sup>  | I     | 1.9                                                        | -0.5    | 6.4   | -1.4       | -4.9    | 1.3   | 0.17       | -0.43   | 0.79  | -0.08     | -0.5    | 0.4   |
|                              | II    | 2.0                                                        | -0.6    | 6.7   | -0.8       | -6.9    | 2.3   | -0.05      | -0.89   | 0.72  | 0.15      | -1.2    | 2.3   |
|                              | III   | 0.7                                                        | -1.9    | 4.0   | -0.6       | -5.0    | 2.6   | -0.18      | -0.94   | 0.49  | -0.36     | -2.2    | 1.4   |
| LVEDv,<br>ml                 | I     | 3.8                                                        | -3.8    | 15    | -0.7       | -10     | 8.3   | -0.85      | -2.8    | 1.0   | -0.45     | -1.9    | 1.0   |
|                              | II    | 3.2                                                        | -5.3    | 16    | 0.7        | -13     | 11    | -1.3       | -3.7    | 0.9   | -0.29     | -4.1    | 4.7   |
|                              | III   | 0.7                                                        | -9.0    | 11    | 2.7        | -8.9    | 16    | -0.44      | -2.8    | 1.9   | -1.3      | -8.8    | 4.8   |
| Systolic function            |       |                                                            |         |       |            |         |       |            |         |       |           |         |       |
| EF, %                        | I     | 0.24                                                       | -2.5    | 3.4   | -0.05      | -3.2    | 3.0   | 0.33       | -0.28   | 0.97  | -0.16     | -0.6    | 0.3   |
|                              | II    | 0.31                                                       | -2.9    | 3.8   | 0.15       | -3.7    | 4.0   | 0.32       | -0.39   | 1.0   | -0.22     | -1.7    | 1.1   |
|                              | III   | 0.34                                                       | -2.9    | 4.3   | -0.33      | -5.3    | 3.7   | 0.16       | -0.70   | 0.99  | -0.50     | -2.9    | 1.7   |
| MFS, %                       | I     | -0.15                                                      | -1.2    | 0.8   | 0.20       | -0.8    | 1.3   | 0.004      | -0.20   | 0.22  | -0.09     | -0.25   | 0.07  |
|                              | II    | -0.27                                                      | -1.5    | 0.8   | 0.20       | -1.0    | 1.8   | 0.012      | -0.23   | 0.26  | -0.17     | -0.86   | 0.29  |
|                              | III   | -0.16                                                      | -1.4    | 1.0   | 0.19       | -1.2    | 1.8   | 0.030      | -0.25   | 0.32  | -0.21     | -1.2    | 0.51  |
| s'                           | I     | -0.21                                                      | -1.0    | 0.37  | 0.047      | -0.65   | 0.76  | 0.13       | -0.006  | 0.29  | -0.037    | -0.14   | 0.07  |
|                              | II    | -0.21                                                      | -1.1    | 0.41  | 0.001      | -0.74   | 0.97  | 0.14       | -0.024  | 0.31  | -0.064    | -0.42   | 0.12  |
|                              | III   | -0.20                                                      | -1.1    | 0.42  | 0.025      | -0.78   | 1.1   | 0.15       | -0.034  | 0.36  | -0.060    | -0.59   | 0.24  |
| Diastolic function           |       |                                                            |         |       |            |         |       |            |         |       |           |         |       |
| E/A                          | I     | 0.007                                                      | -0.16   | 0.19  | 0.068      | -0.14   | 0.32  | -0.010     | -0.052  | 0.031 | 0.03      | -0.06   | 0.001 |
|                              | II    | -0.016                                                     | -0.21   | 0.18  | 0.052      | -0.20   | 0.37  | -0.004     | -0.051  | 0.044 | -0.04     | -0.14   | 0.02  |
|                              | III   | -0.003                                                     | -0.20   | 0.21  | 0.062      | -0.22   | 0.42  | -0.002     | -0.055  | 0.051 | -0.05     | -0.18   | 0.05  |
| E/e'                         | I     | <b>0.43</b>                                                | 0.05    | 1.3   | -0.41      | -1.1    | 0.04  | 0.023      | -0.08   | 0.13  | -0.01     | -0.09   | 0.06  |
|                              | II    | <b>0.42</b>                                                | 0.01    | 1.2   | -0.35      | -1.7    | 0.18  | 0.005      | -0.14   | 0.17  | 0.04      | -0.14   | 0.48  |
|                              | III   | <b>0.46</b>                                                | 0.05    | 1.4   | -0.43      | -2.3    | 0.15  | -0.019     | -0.23   | 0.16  | 0.05      | -0.43   | 0.68  |
| LADI,<br>cm/m <sup>2.7</sup> | I     | 0.015                                                      | -0.031  | 0.078 | 0.01       | -0.04   | 0.07  | -0.003     | -0.015  | 0.010 | -0.005    | -0.014  | 0.003 |
|                              | II    | 0.009                                                      | -0.045  | 0.077 | 0.03       | -0.03   | 0.09  | -0.002     | -0.016  | 0.012 | -0.005    | -0.030  | 0.017 |
|                              | III   | -0.003                                                     | -0.060  | 0.054 | 0.04       | -0.02   | 0.12  | -0.008     | -0.024  | 0.007 | -0.009    | -0.057  | 0.023 |

95 % CI: 95 % confidence interval, A: Velocity of the late filling wave of the left ventricle in diastole, e': Tissue velocity of the lateral mitral annulus during early diastolic filling of the left ventricle, E: Velocity of early filling wave of the left ventricle in diastole, EF: Ejection Fraction, EH: Essential hypertension, MFS: Midwall fractional shortening, LADI: Left atrial diameter indexed to height in m<sup>2.7</sup>, LVEDv: Left ventricular end diastolic volume, LVMI: Left ventricular mass indexed to height in m<sup>2.7</sup>, RWT: Relative wall thickness, s': Average tissue velocity of the septal and lateral left ventricular wall in systole

\* Model I adjusted for offspring sex, offspring age at follow-up

† Model II additionally adjusted for maternal age, diabetes/glycosuria during pregnancy, parity, smoking during pregnancy, maternal body mass index, maternal education, maternal diastolic blood pressure gestational week 8, and, when applicable, previous rate of blood pressure change during the pregnancy

‡ Model III additionally adjusted for maternal preeclampsia/hypertension during pregnancy, offspring birth weight, gestational length, offspring body mass index, offspring mean arterial pressure

Figure S1.

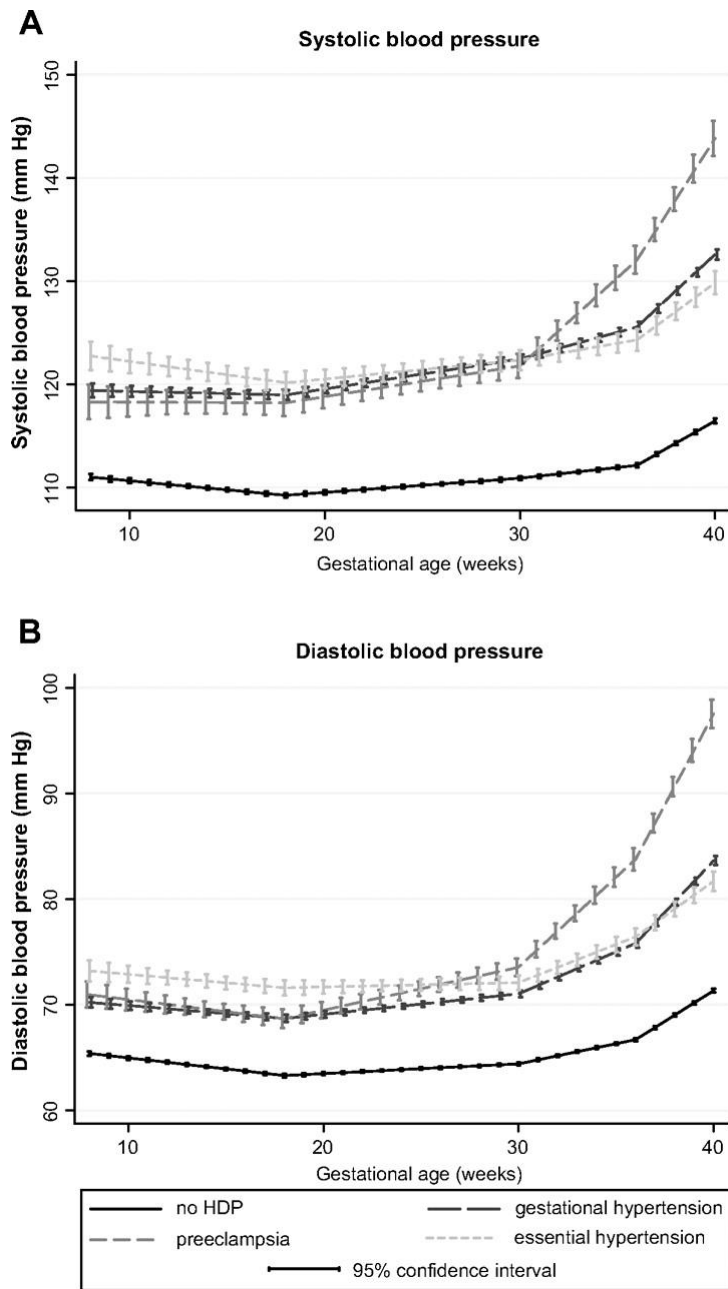

Figure Legend:

**Figure S1.** Description of the maternal blood pressure trajectories during pregnancy by hypertensive disorders of pregnancy in the ALSPAC cohort. Reproduced with permission from *Hypertension*<sup>1</sup>

### **Supplemental Reference:**

1. Macdonald-Wallis C, Lawlor DA, Fraser A, May M, Nelson SM, Tilling K. Blood pressure change in normotensive, gestational hypertensive, preeclamptic, and essential hypertensive pregnancies. *Hypertension*. 2012;59:1241–1248.
